# Supplementary material for: Certain Tomato Root Exudates Induced by Pseudomonas stutzeri NRCB010 Enhance Its Rhizosphere Colonization Capability
Source: MDPI journal article supplement (doi:10.3390/metabo13050664), 2023-05-16
Supplement: s1 [file s1]

## **Supplementary materials**

### **Supplementary methods**

Fifty mg L<sup>-1</sup> n-hexadecanoic acid on *Pseudomonas stutzeri* NRCB010 responding to NaCl, pH, and Cu<sup>2+</sup> stresses were evaluated with a 96-well microplate. 188 µL one-fifth NBNS medium with different pH, NaCl, and Cu<sup>2+</sup>, 10 µL NRCB010 suspension, and 2 µL 5 g L<sup>-1</sup> n-hexadecanoic acid were added into a well, mixed thoroughly, and then incubation at 30°C, 100 rpm shaker for 48 h. OD600 was measured by a microplate analyzer to indicating NRCB010 biomass.

## Supplementary figures

Figure S1.

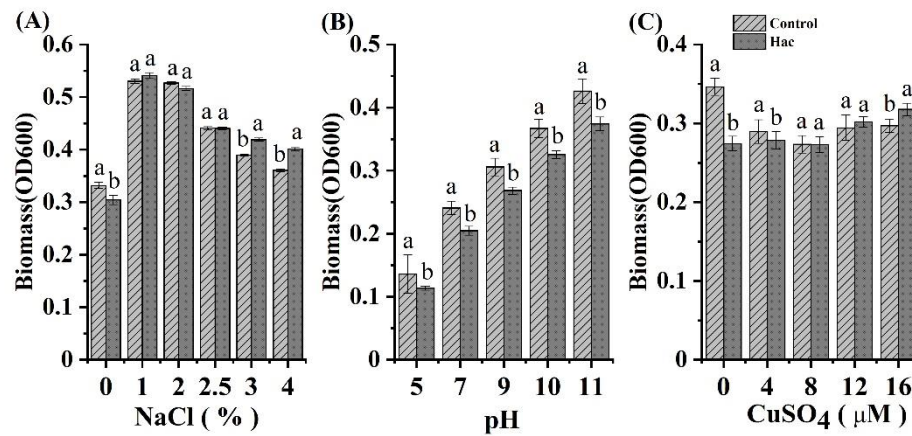

**Figure S1.** Effects of n-hexadecanoic acid (Hac) on *Pseudomonas stutzeri* NRCB010 responding to (A) NaCl, (B) pH, and (C) Cu<sup>2+</sup> stresses. Bars are means ± standard error (n = 16). Different letter above the bars at the same stress's condition denote significant differences between treatments by Duncan's post-hoc test ( $p < 0.05$ )

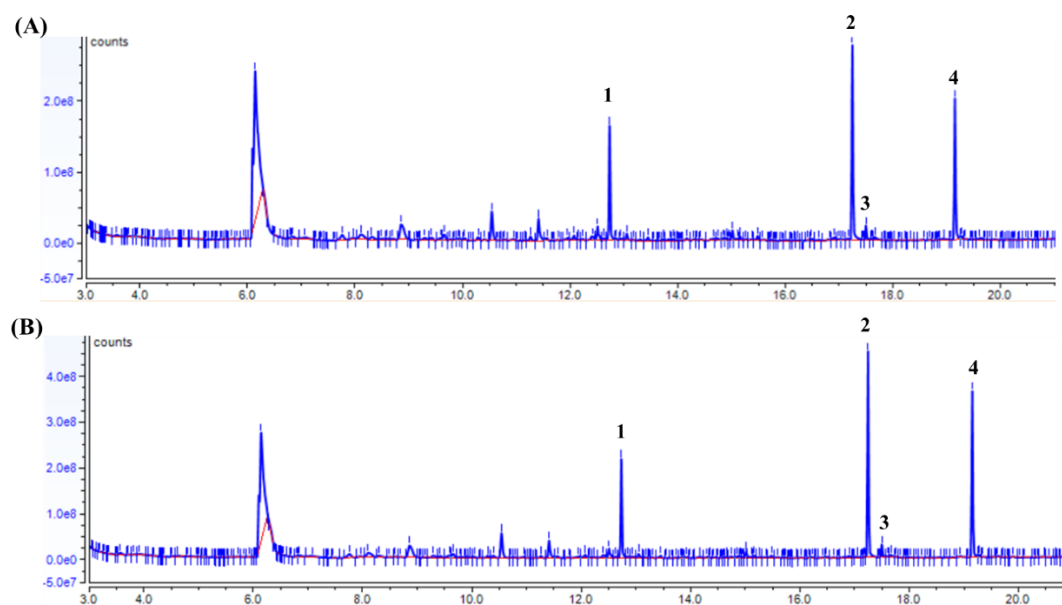

**Figure S2.** Ion chromatogram of root exudates of tomato (A), and tomato inoculated with NRCB010 (B). 1. 2,4-Di-tert-butylphenol (12.738 min), 2. Methyl hexadecanoate (17.248 min), 3. n-Hexadecanoic acid (17.503 min), 4. Methyl stearate (19.152 min).

# Supplementary table

**Table S1** Compositions of tomato root exudates (RE/ NRCB010–) and induced by *Pseudomonas stutzeri* NRCB010 (RE/ NRCB010+)

| No. | Retention Time (min) | Compounds                                                                                        | Relative area (%) |              |
|-----|----------------------|--------------------------------------------------------------------------------------------------|-------------------|--------------|
|     |                      |                                                                                                  | RE/ NRCB010–      | RE/ NRCB010+ |
| 1   | 3.572                | t-Butyl-(2-[3-(2,2-dimethyl-6-methylene-cyclohexyl)-propyl]- [1,3] dithian-2-yl)-dimethyl-silane | 0.24              | 0.29         |
| 2   | 4.599                | Cystine                                                                                          | 0.16              | 0.13         |
| 3   | 6.150                | 2-Pyrrolidinone, 1-methyl-                                                                       | 29.11             | 23.27        |
| 4   | 6.850                | Mannosamine                                                                                      | 0.21              | 0.29         |
| 5   | 7.776                | Aziridine, 2-methyl-2-phenyl-                                                                    | 0.76              | 0.75         |
| 6   | 7.973                | 12,15-Octadecadiynoic acid, methyl ester                                                         | 0.35 **           | 0.16         |
| 7   | 8.160                | 2,6-Xylidine                                                                                     | 0.62              | 1.14         |
| 8   | 8.323                | 6,9,12-Octadecatrienoic acid, phenylmethyl ester, (Z, Z, Z)-                                     | 0.37              | 0.38         |
| 9   | 8.605                | Dodecanoic acid, 3-hydroxy-                                                                      | 0.16              | 0.17         |
| 10  | 8.864                | Benzaldehyde, 3,5-dimethyl-                                                                      | 2.88              | 2.75         |
| 11  | 9.303                | Pterin-6-carboxylic acid                                                                         | 0.47              | 0.38         |
| 12  | 9.432                | Octadecane, 6-methyl-                                                                            | 0.50              | 0.26         |
| 13  | 9.599                | Nonanal dimethyl acetal                                                                          | 0.33              | 0.44 *       |
| 14  | 9.663                | 2,3,5,8-tetramethyl-Decane                                                                       | 0.89              | 0.56         |
| 15  | 9.980                | l-Gala-l-ido-octose                                                                              | 0.24              | 0.30         |
| 16  | 10.299               | Octadecane, 6-methyl-                                                                            | 0.48              | 0.29         |
| 17  | 10.425               | Octaethylene glycol monododecyl ether                                                            | 0.22              | 0.30 *       |
| 18  | 10.544               | 3,4-Dimethylbenzamide                                                                            | 1.96              | 3.00 *       |
| 19  | 10.918               | 5-Dimethyl (dichloromethyl) silyloxypentadecane                                                  | 0.20              | 0.22         |
| 20  | 11.275               | Octadecane, 6-methyl-                                                                            | 0.37 *            | 0.28         |
| 21  | 11.418               | Dodecanal                                                                                        | 1.70              | 1.86         |
| 22  | 11.578               | Octadecane, 6-methyl-                                                                            | 0.40              | 0.28         |
| 23  | 11.952               | Octadecane, 6-methyl-                                                                            | 0.41              | 0.26         |
| 24  | 12.071               | Heptadecane, 2,6,10,14-tetramethyl-                                                              | 0.75 **           | 0.46         |
| 25  | 12.401               | Tetradecane, 2,6,10-trimethyl-                                                                   | 0.80              | 0.50         |
| 26  | 12.517               | 2,6-dimethyl-Heptadecane                                                                         | 1.47              | 0.96         |
| 27  | 12.738               | 2,4-Di-tert-butylphenol                                                                          | 6.23              | 7.60 *       |
| 28  | 12.857               | Cyclopropanedodecanoic acid, 2-octyl-, methyl ester                                              | 0.20              | 0.16         |
| 29  | 13.058               | Eicosane, 2-methyl-                                                                              | 0.61              | 0.41         |
| 30  | 13.445               | Dodecane, 1,1-dimethoxy-                                                                         | 0.29              | 0.32         |
| 31  | 14.741               | Octadecane, 6-methyl-                                                                            | 0.33              | 0.22         |
| 32  | 15.020               | Decane, 2,3,5,8-tetramethyl-                                                                     | 0.79              | 0.50         |
| 33  | 15.163               | Tetradecanoic acid, 12-methyl-, methyl ester                                                     | 0.27              | 0.24         |
| 34  | 15.489               | Heptadecane, 2,6,10,15-tetramethyl-                                                              | 0.44              | 0.28         |
| 35  | 17.248               | Methyl hexadecanoate                                                                             | 8.50              | 13.59 **     |
| 36  | 17.503               | n-Hexadecanoic acid                                                                              | 0.51              | 0.88 **      |
| 37  | 17.670               | Heptadecane, 2,6,10,15-tetramethyl-                                                              | 0.35              | 0.32         |

|    |        |                                |      |         |
|----|--------|--------------------------------|------|---------|
| 38 | 18.928 | Ethyl iso-allocholate          | 0.24 | 0.31 ** |
| 39 | 19.152 | Methyl stearate                | 5.24 | 11.45 * |
| 40 | 19.282 | Tetradecane, 2,6,10-trimethyl- | 0.29 | 0.20    |
| 41 | 19.646 | 2-Myristynoyl pantetheine      | 0.25 | 0.20    |

Note: the more asterisks after the data of the same component means more significant differences between RE/ NRCB010- and RE/ NRCB010+ treatments by *t* test. \**p* < 0.05, \*\* *p* < 0.01.
